# Supplementary material for: CHILDA − Czech Historical Landslide Database
Source: Copernicus journal article supplement (doi:10.5194/nhess-2021-112), 2021-04-14
Supplement: Supplementary file [file nhess-2021-112-RC2-supplement.pdf]

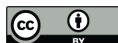

# 1 CHILDA – Czech Historical Landslide Database

2 Michal Bíl<sup>1</sup>, Pavel Raška<sup>2</sup>, Lukáš Dolák<sup>3,4</sup>, Jan Kubeček<sup>1</sup>

3 <sup>1</sup> CDV – Transport Research Centre, Brno, 636 00, Czechia

4 <sup>2</sup> Department of Geography, J. E. Purkyně University in Ústí nad Labem, Czechia

5 <sup>3</sup> Department of Geography, Masaryk University in Brno, Czechia

6 <sup>4</sup> Global Change Research Institute of the Czech Academy of Sciences, Brno, Czechia

7 *Correspondence to:* Michal Bíl ([michal.bil@cdv.cz](mailto:michal.bil@cdv.cz))

8 **Abstract:** National and regional historical landslide databases are increasingly viewed as providing empirical  
9 evidence for the geomorphic effects of ongoing environmental change and for supporting adaptive territorial  
10 planning. In this work, we present the design and current content of the Czech Historical Landslide Database  
11 (CHILDA), the first of its kind for the territory of Czechia (the Czech Republic). We outline the CHILDA system,  
12 its functionality and technical solution. The database was established by merging and extending the fragmented  
13 regional datasets for highly landslide prone areas in Czechia. Currently, the database includes 699 records (619  
14 landslides, 75 rockfalls, and 5 other movement types) encompassing the period from the oldest determined records  
15 (1132) up to 1989 which represents an important cultural, political and socioeconomic divide. Along with  
16 characterizing the content of the database, we discuss its further developments and applications.

## 17 1 Introduction

18 Historical landslide inventories and databases are among the key challenges within landslide risk reduction efforts  
19 as they fill the gap, on one hand, between the landslide occurrence in the past environments studied with the use  
20 of various proxies and the present-day landslides, for which different monitoring and mapping techniques may be  
21 used, on the other (e.g., Glade et al., 2001; Raška et al., 2015; Piacentini et al., 2018). In light of the recent global  
22 climate change, the historical landslide databases contribute a better understanding to changes in various  
23 meteorological triggers of landslides in different environmental settings (Gariano and Guzzetti, 2016; Caracciolo  
24 et al., 2017). Given the severe impacts of landslides on society (Froude and Petley, 2018), these databases also  
25 make it possible to identify changes in hot spots of landslide occurrence and the character of their impacts (Klose  
26 et al., 2016). In both these respects, the historical databases complement current landslide inventories that can be  
27 used to trace the spatial patterns in landslide occurrence and their causative factors (Van Den Eeckhaut and Hervás,  
28 2012; Herrera et al., 2018; Marc et al., 2018). Within the landslide hazard and risk assessments, the historical  
29 landslide databases provide evidence as it is generally assumed that past landslide occurrence frequencies may be  
30 used to describe the probabilities of landslide occurrence in the near future (Remondo et al., 2008; Van Den  
31 Eeckhaut et al., 2009; Wu and Yeh, 2020).

32 Connecting these directions, increasing attention has been also paid to revealing the vulnerabilities and adaptive  
33 behaviours of past societies regarding landslides (Tropeano and Turconi, 2004; Caloiero et al., 2014; Klose et al.,

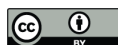

2016; Raška, 2019; Klimeš et al., 2020). These studies argue that historical landslide databases – if approached critically – may inform current efforts for adaptive management of landslide risks (Klose et al., 2016; Raška and Dubišar, 2017). Historical landslide databases have been recently established for various countries and regions, for instance, in Italy (Guzzetti et al., 1994; Piacentini et al., 2018), Nicaragua (Devoli et al., 2007), USA (Elliott and Kirschbaum, 2007), Norway (Hermanns et al., 2013), the United Kingdom (Taylor et al., 2015), Germany (Damm and Klose, 2015), Portugal (Pereira et al., 2014), most of them covering ca. the last 150 years, but some databases also including scarce records dating back as early as the twelfth century.

The aim of this work is to present the Czech Historical Landslide Database (CHILDA), a project that unified and extended the fragmented existing regional databases and established an open access and concurrently updated map inventory of historical landslides in Czechia. The presented database thus further fills in the gap of missing historical databases for Central-European mid-mountain environments (Damm and Klose, 2015). Within this paper, *landsliding* is used as a generic term covering all major types of rapid mass movements (cf. Hungr et al., 2014) that are usually recorded in the documentary data. Slow slope deformations are not studied here since they usually did not cause rapid harm to society and have not been registered by past societies. For CHILDA content, we only differentiate the three following groups according to major mechanism: (a) landslides *sensu stricto* (also including spreading and flows), (b) rock falls (including topples) in solid bedrock, while (c) all remaining mass movements are grouped as 'others'. This rough classification is used since the documentary data often do not allow for detailed and reliable identification of the mass movement type.

In the following sections, we will first review the previous studies on historical landslides in Czechia with emphasis given to attempts to establish systematic historical landslide databases. We will then outline the availability of the documentary sources and present a design of the CHILDA. Finally, the current content of this database and its completeness will be presented in a comparative perspective along with discussion of its future directions. Although CHILDA is an open database, the last analysed year was set to 1989 for the purpose of this study. The year is considered an important cultural, political and socioeconomic divide in the recent history of Czechia, turning the country into a democratic regime and thus influencing production, diversity and accessibility of documentary data and the data from ongoing landslide monitoring.

## 2. Landslides in Czechia

### 2.1 Landslide Predispositions in Czechia

Despite the fact that Czechia can be generally considered a low-risk country, given the relatively low landslide frequencies and impacts (Klimeš et al., 2017), the country displays high spatial variability in landslide occurrence with some highly landslide-prone regions due to their predisposition and presence of causative factors. Among the most affected by landslides are the Outer Western Carpathians (OWC), NW Czechia (České středohoří Mts., Děčínská vrchovina) and several of the scattered spatially limited areas across the country (see Figure 1).

The eastern part of Czechia, OWC, is built up of Tertiary and Mesozoic flysch rocks which are particularly susceptible to landsliding. As a consequence, for example, of the 1997 landslide period as many as 3,700



71 individual landslides were mapped in that region (Krejčí et al., 2002). High numbers of reactivated landslides  
72 were also further identified during the periods of intense landsliding which followed, specifically in 2006 (Bíl  
73 and Müller, 2008), and 2010 (Pánek et al., 2011). The Registry of Slope Deformations of the Czech Geological  
74 Survey ([www.geology.cz](http://www.geology.cz)) contains in all approximately 14,500 landslides in this area of the Czech part of the  
75 OWC (7,200 km<sup>2</sup>), which was 82 % of all the landslides registered within Czechia (Bíl et al., 2016).

76 In NW Czechia, two major areas display high landslide susceptibility, namely the České středohoří Mts. (CS)  
77 and the Děčínská vrchovina Highland (DV). The lithology of CS is built up of Neogene volcanic rocks,  
78 including basalts and phonolites and their volcanoclastics, surrounded or underlain by Mesozoic weak  
79 sedimentary rocks (Cajz, 1999). In a rugged terrain, such conditions often result in landsliding accelerated during  
80 the snow-melt season and heavy rainfalls (Hroch et al., 2002; Raška et al., 2014a; CHMI, 2020). DC is formed in  
81 an uplifted and dissected Mesozoic sandstones, which are prone to rockfalls and toppling (Kalvoda and Balatka,  
82 1995; Zvelebil et al., 2005). These mainly occur in the tectonically predisposed and deeply eroded valley of the  
83 Labe/Elbe River and its tributaries. Weathering, bioturbation as well as human alterations of the terrain act as the  
84 most frequent causative factors.

85 Other parts of Czechia are not as susceptible to landsliding to the extent comparable to the above-mentioned  
86 three primary landslide areas (OWC, CS, DV). Landslide activity has been long recorded in the Neogene and  
87 Quaternary sediments of the Most basins (MB, see Figure 1), along the banks of the Ohře/Eger River and in the  
88 anthropogenic landscape at the edges of the open-pit brown coal mines (e.g., Burda et al., 2013). Another area  
89 prone to landslides is in central-eastern Czechia in the Mesozoic sandstones of the Bohemian Paradise (BP)  
90 which form steep elevations and rockfall-prone areas (e.g., Forczek, 2008). Rockfalls occur along a number of  
91 deeply incised valleys in the Bohemian Massif (e.g., along the Vltava/Moldau river valley south of Prague, VR)  
92 as well as some transportation corridors, particularly along rail tracks (as documented in a database of road and  
93 railway blockages due to natural processes, [www.rupok.cz](http://www.rupok.cz) (Bíl et al., 2017)).

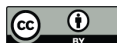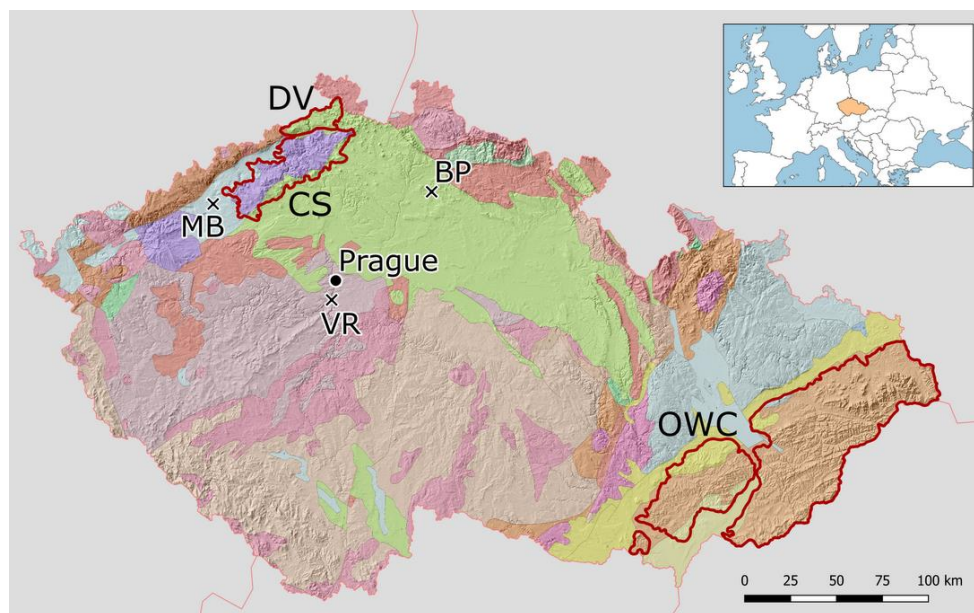

**Figure 1:** Delimitation of the primary areas where landsliding concentrates in Czechia. Neogene volcanic rocks (CS – České středohoří Mts.), Mesozoic sandstones (DV – Děčínská vrchovina Mts.), Neogene and Quaternary sediments (MB – Most Basin) on the west, Mesozoic sandstones in central parts of Czechia (BP – Bohemian Paradise sandstones) and Mesozoic and Tertiary flysch belt (OWC – Outer Western Carpathians) in the east of Czechia represent the most susceptible parts to landsliding. VR – concentration of rockfalls along the Vltava river [https://mapy.geology.cz/arcgis/rest/services/Inspire/GM2\\_5mil/MapServer](https://mapy.geology.cz/arcgis/rest/services/Inspire/GM2_5mil/MapServer). © Czech Geological Survey.

## 2.2 Historical Landslide Research in Czechia

### 2.2.1 The Beginning of Landslide Research in Czechia

The first protoscientific works that also included reports on landsliding in Czechia are dated to the eighteenth century (e. g. Strnad, 1790), followed by geological and engineering geological scientific works emerging as of the end of the nineteenth century (Zahálka, 1890; Dědina, 1896; Woldřich, 1899) and at the beginning of the twentieth century (Čermák, 1912; Dědina, 1916). More systematic landslide research which described landsliding in the area of modern Czechia started, however, in the 1920s with the work of Záruba (1922, 1923, 1926, 1938). Particular attention was paid to a general description of historical landslide areas in the Pavlovské vrchy Hills situated in OWC (Jüttner 1931, 1937) as well as historical landslides themselves in the same area (Stejskal, 1931; Woldřich and Stejskal, 1934). Záruba and Myslivec (1942) documented landslides related to transportation infrastructure in OWC. Landsliding in the broader area of the city of Zlín (OWC) was described by Krejčí (1943). The first Czech modern landslide classification was published by Záruba and Mencl (1954).



115

## 116 2.2.2 Systematic Works Describing Landslide Occurrence Based on Historical Data

117 We present here an overview of works from Czechia which created at least a regional landslide chronology based  
 118 on documentary data analyses. The only systematic studies of landslide occurrence, based on a range of historical  
 119 sources in Czechia, were conducted by Špůrek (1967, 1972, 1985). These studies were mainly based on the  
 120 investigation of articles published in national newspapers covering the territory of former Czechoslovakia (and  
 121 also mentions landsliding all over the world). The recorded information includes each landslide date, location, type  
 122 and amount of damage as well as the bibliographic source.

123 There have not been any other attempts to prepare an overview of dated landslides for all of Czechia which  
 124 would follow up on Špůrek's work from 1970 onwards. Concerning debris avalanches, which are only located in  
 125 the highest parts of Czechia, Pilous (1973) presented their overview from the Krkonoše Giant Mnts. The efforts  
 126 have been re-established since the 2000s and have focused on the major Czech areas prone to landsliding.

127 For the Outer Western Carpathians, Bíl et al. (2014) studied historical landsliding in an area around the village of  
 128 Halenkovice (central part of OWC). They analysed documentary data, chronicles and interviewed eyewitnesses.  
 129 They determined dates for 120 individual landslides. The oldest records were found in local chronicles and  
 130 described landsliding in two villages (Jankovice and Košíky) in the close vicinity of Halenkovice in 1915. Bíl et  
 131 al. (2020) created an overview of the chronology of landsliding in the Pavlovské vrchy Hills, an area at the  
 132 Czech-Austria border belonging to the Western Carpathian Flysch Belt. They determined dates for 30 historical  
 133 landslides. The first written resource relates to a landslide record dating back to 1663.

134 In NW Czechia, Raška et al. (2015) established a regional historical landslide database which was compared  
 135 with the central part of OWC in respect to the data availability and content. The multihazard database for the  
 136 latter half of the nineteenth century (Raška and Dubišar, 2017) allowed for an exploration of the relative direct  
 137 impacts of landslides on society. Finally, Raška (2019) used the landslide database to suggest five phases in the  
 138 evolution of community-based landslide risk reduction and the various approaches and mechanisms employed in  
 139 landslide mitigation measures.

140 Apart from these works, several studies have been published which used historical data to understand current  
 141 local landslide hazards (Krejčí et al., 2017) and which explored the availability of documentary sources (Kozák  
 142 and Rybář, 2003).

## 143 3. Design of the CHILDA Database

### 144 3.1 Data availability

145 Czechia disposes of an extremely diverse and extensive range of documentary data that may be explored to build  
 146 historical landslide inventories. The number of these sources have been, however, subjected to academic scrutiny  
 147 mostly in historical climatology and hydrology (Kjeldsen et al., 2014; Brázdil et al., 2018a). Similarly, Bíl et al.  
 148 (2020) combined different documentary and archaeological data to compile a chronology of landsliding in the  
 149 Pavlovské vrchy Hills (Czechia, OWC) and described the basic historical landslides terminology. The conceptual  
 150 differences in hydrometeorological and geomorphologic hazards do not allow for uncritical transposition of the



151 climatological insights into the historical landslide research and therefore call for new insights into the potential  
 152 of the documentary data (Crozier and Glade, 1999; Raška et al., 2014b).

153 The present landslide database is based on a systematic data search in documentary data (both written and  
 154 iconographic) of several types with varying content, coverage and availability (Figure 2). Most of these data are  
 155 available in local archives in a printed or hand-written form (e.g., municipal and school chronicles, official  
 156 correspondence, photos), while some were found in private collections. The primary documentary data were also  
 157 complemented by a search in secondary (published) literature (e. g. newspapers, historical synthesis, historical  
 158 research into forests) and in some areas also with oral inquiry. Within the data search, the lower time boundary for  
 159 the database has not been set. The upper (recent) boundary, for the aim of the analysis in this work, was set at  
 160 1989, representing a significant socio-economic and political turn in Czech history and thus marking the change  
 161 in public data availability as well as in approaches to scientific inquiry regarding landslides. We have allowed,  
 162 however, the database to remain open in order to allow users to add new landslides as well.

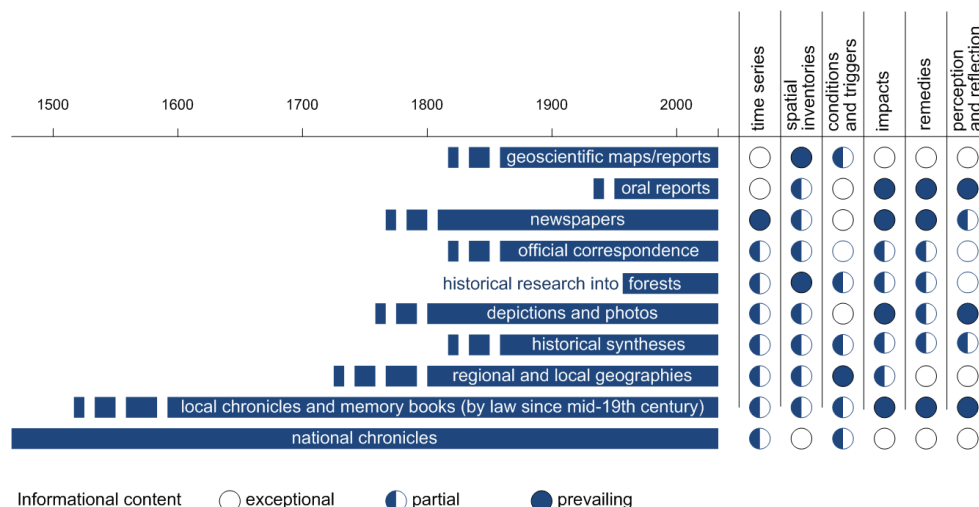

164 *Figure 2 An overview of available documentary data applicable for historical landslide research in Czechia with*  
 165 *respect to their time coverage and informational content*

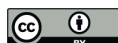

### 3.2 Database Structure

Attributes related to each database record are presented in Table 1. Some of the attributes are added by users via a form. The items with an asterisk are mandatory and the items which are not part of the input form are underlined. They are processed automatically, within the system.

Table 1: Structure of records in Childa.

| Name *        | Meaning                                                                                                      | Values                                                                                                                                                                 |
|---------------|--------------------------------------------------------------------------------------------------------------|------------------------------------------------------------------------------------------------------------------------------------------------------------------------|
| <u>ID</u>     | Unique identifier of a landslide                                                                             | Number                                                                                                                                                                 |
| Type *        | Determination of kind of landsliding                                                                         | List: Landslide; rockfall; earthflow; debris flow; human-induced landslide                                                                                             |
| Position *    | Latitude and longitude of the record inserted via a click on the map                                         | WGS 84 coordinates                                                                                                                                                     |
| Locality *    | Description of the locality                                                                                  | String                                                                                                                                                                 |
| Accuracy *    | Describes the spatial precision of landslide localization by DB user (not a precision in an original source) | List: Metres; tens of metres; hundreds of metres; kilometres                                                                                                           |
| <u>MASL</u>   | Height above mean sea level - Landslide highest point elevation                                              | Metres                                                                                                                                                                 |
| Count         | The number of landslides related to the particular location, given its accuracy; default value 1             | String                                                                                                                                                                 |
| Start *       | The earliest possible date for the beginning of landsliding indicated by a record                            | Date                                                                                                                                                                   |
| End *         | The latest possible date for the beginning of landsliding as indicated by a record                           | Date                                                                                                                                                                   |
| <u>Period</u> | Shows an interval during which the landslide originated. It is computed as End – Start.                      | String                                                                                                                                                                 |
| Causes        | Description of landslide cause, more causes can be selected                                                  | List: Earthquake; lithology; flooding; precipitation; mining; snow thaw; storm; artificial cause                                                                       |
| Magnitude     | Degree of landslide damage in three categories                                                               | List: 1 - Negligible or no losses; approx. 1ha or road infrastructure; 2 - hundreds of metres, >1ha; 3 - large volumes and areas, deep seated landslides               |
| Impact        | List of losses caused by landsliding, more impacts can be selected                                           | List: Human fatality; human injury; buildings; transport infrastructure; other infrastructure (mine, water tower, utilities, etc); landscape including old mines, etc. |
| Remedies      | Kind of remediation if applied                                                                               | String                                                                                                                                                                 |





|          |                                                                                                                           |                    |
|----------|---------------------------------------------------------------------------------------------------------------------------|--------------------|
| Source * | Full citation of the source of the landslide record                                                                       | String             |
| Details  | Additional information and original data availability and accessibility (e.g., museum, archive, private collection, etc.) | String             |
| Notes    | Other relevant information about landsliding                                                                              | String             |
| Photo    | More than one graphics file can be attributed to a record, e.g., photo, map, a copy of a written source, etc.             | Graphics file, pdf |

174 \* *Mandatory attributes.*

175 *Note: The attributes which are underlined are automatically added by the system and are not part of the user*

176 *form for data entering.*

177

### 178 3.3 Web-map Application

179 The database can be accessed through a web-map application at <https://childa.cz> (Figure 3). CHILDA is

180 administrated and hosted on the CDV – Transport Research Centre servers. The software requirement is as

181 follows: PostgreSQL/PostGIS, php, php NetteFramework, HTML, CSS, JQuery.

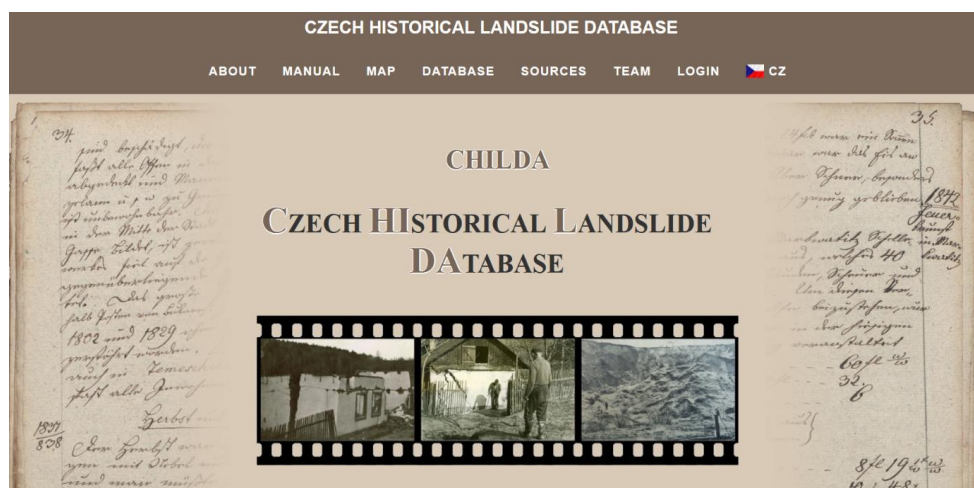

182

183 *Figure 3: Title page of CHILDA ([www.childa.cz](http://www.childa.cz)).*

184 CHILDA users can select a background map (see Figure 4, A). There are the following possibilities: base map,

185 orthophoto, Open Street Map, Mapy.cz map and a hiking map. A municipality or other geographical feature with

186 a conventional name (mountains, etc.) can be selected via a form (B). The full-screen mode is launched when a

187 user clicks on the icon (C). Standard map control features such as full extent (D), backward and forward screen

188 (E), Google Street View (G) and zoom in/out (H) are also available here. A detailed landslide description is

189 shown in the pop-up window after clicking on the landslide map symbol (F). A new landslide record can be





190 added through a form (I). This panel contains two bookmarks. In the *Layer*, the symbology and the time filter  
 191 can be seen. In the *New*, a new landslide record can be added, or an existing one can be edited. Only registered  
 192 users can edit their own landslides. The edit button is visible in the pop-up window in the map or in the Database  
 193 after log in. There is currently no automatic validation of data entered by users to have the app as accessible and  
 194 user friendly as possible. Three roles of users are defined: non-registered users, registered users (who are  
 195 allowed to edit, delete their own data) and administrators (editing, deleting all data).

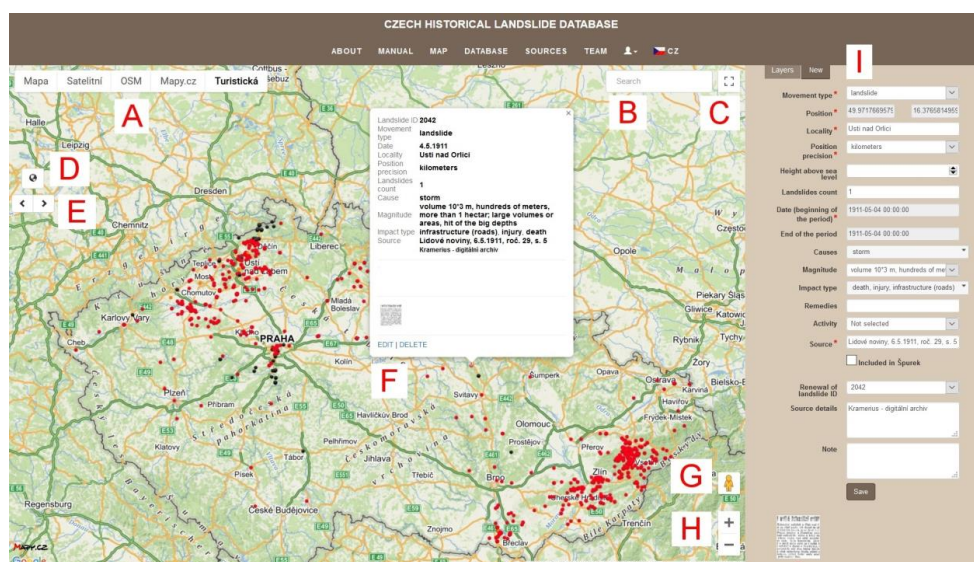

196  
 197 *Figure 4: Additional information on a landslide record can be obtained after clicking on a point in the map*  
 198 *view. A new landslide can be added through the form (right side). A – background map, B – municipality, C –*  
 199 *full-screen mode, D – full extent control, E – backward/forward screen, F - landslide description, G – Google*  
 200 *Street View, H – zoom in/out, I – new landslide button. © Mapy.cz*

201

202 The landslide database is also accessible via a table (Figure. 5). Four filters are available: movement type,  
 203 magnitude, only selection of records added by a particular user and time period. Full text searching is also  
 204 possible. The given filter is kept when the map is selected unless it is reset by the user.



| CZECH HISTORICAL LANDSLIDE DATABASE            |           |                  |                    |      |       |                 |               |           |                                       |          |                                  |   |   |
|------------------------------------------------|-----------|------------------|--------------------|------|-------|-----------------|---------------|-----------|---------------------------------------|----------|----------------------------------|---|---|
| ABOUT GUIDE MAP DATABASE SOURCES TEAM LOGIN CZ |           |                  |                    |      |       |                 |               |           |                                       |          |                                  |   |   |
| DATABASE                                       |           |                  |                    |      |       |                 |               |           |                                       |          |                                  |   |   |
| Select the movement's type                     |           | Select magnitude |                    | From |       | 1912-04-01      |               | Fulltext  |                                       | Reset    |                                  |   |   |
| ID                                             | Type      | Locality         | Accuracy           | MASL | Count | Date of origin  | Causes        | Magnitude | Impact                                | Remedies | Source                           | D | M |
| 2043                                           | landslide | Blina            | kilometers         |      | vice  | 3/1531 - 5/1531 | precipitation |           |                                       |          | Hutter, T. (1891): Die Stadt...  |   |   |
| 2042                                           | landslide | Usti nad Orlici  | kilometers         |      | 1     | 4.5.1911        | storm         | 3         | infrastructure (roads), injury, death |          | Lidové noviny, 6.5.1911, roč.... |   |   |
| 2011                                           | landslide | Maršov           | kilometers         |      | 1     | 1.1.1911        |               |           |                                       |          | Špůrek (1972)                    |   |   |
| 2010                                           | landslide | Potstěj          | hundreds of meters |      | 1     | 1.1.1909        |               |           | infrastructure (roads)                |          | Špůrek (1972)                    |   |   |

Figure 5: A database table visualizes information on landslides and allows for filtering data according to a number of parameters

## 4. Results

### 4.1 Landslide Records in Childa

We present below an overview of data contained in CHILDA for the 1132–1989 period. The database contains 699 records, 619 of them categorised as landslides, 75 as rockfalls and five as 'other' kind of mass movements (earth flow, rockslide or human-induced landslide). As regards temporal accuracy, 231 records were determined exactly at single day precision, 17 records are known with a week and 88 with a month precision. In total, 363 records were only attributed to a given year. Concerning the location accuracy, 111 records were localized precisely, 71 records with a precision of "tens of metres", 260 records to "hundreds of metres" and 478 to kilometres (mostly between 1–2 km, exceptionally up to 5 km in the mountain terrains of Czechia). Table 2 presents database completeness that was determined based on several non-mandatory fields (cause of landsliding, magnitude, impact, etc.). The relative number [%] of particular fields always refers to all records in CHILDA (i.e., a proportion of 100%). The average number of database completeness amounted to 33 %. An increase, however, in database completeness in the next years, based on the incorporation of new results arising from future research, is assumed.

Table 2: Database completeness on the basis of particular non-mandatory fields.

| Filed name           | Number of records | Relative number [%] |
|----------------------|-------------------|---------------------|
| Cause of landsliding | 120               | 17.2                |
| Magnitude            | 181               | 25.9                |
| Impact               | 354               | 50.6                |
| Remedies             | 38                | 5.4                 |
| Source details       | 645               | 92.3                |
| Photo                | 53                | 7.6                 |

Our data can also be compared to the previous landslide chronology compiled by Špůrek (1972) for the area of Czechia. Špůrek's last data on landsliding come from 1970. Our comparison consequently also ends this year. As for 1970, CHILDA currently (April 2021) contains 667 records. In total, 359 of these records were also part of Špůrek's overview. This indicates that our new investigation constitutes almost 50% of new records in the



228 database, i.e., records which were not previously covered by Špůrek's catalogue. A major source of Špůrek's  
 229 information about landsliding was newspapers. We focused in our research, however, apart from newspapers on  
 230 the primary documentary data available in archives (e.g., chronicles, memory books, official correspondence) as  
 231 well. This approach implies huge potential for revealing new and unique landslide events in the future.

232 As Figure 6 indicates, the highest density of historical landslide records in Czechia in the studied period  
 233 concentrates on three primary landslide areas (OWC, CS, DV). Tens of landslide records come, however, from  
 234 the area of the capital Prague (VR) represented mainly by rockfalls. A higher occurrence of records is also  
 235 typical for Bohemian Paradise sandstones (BP).

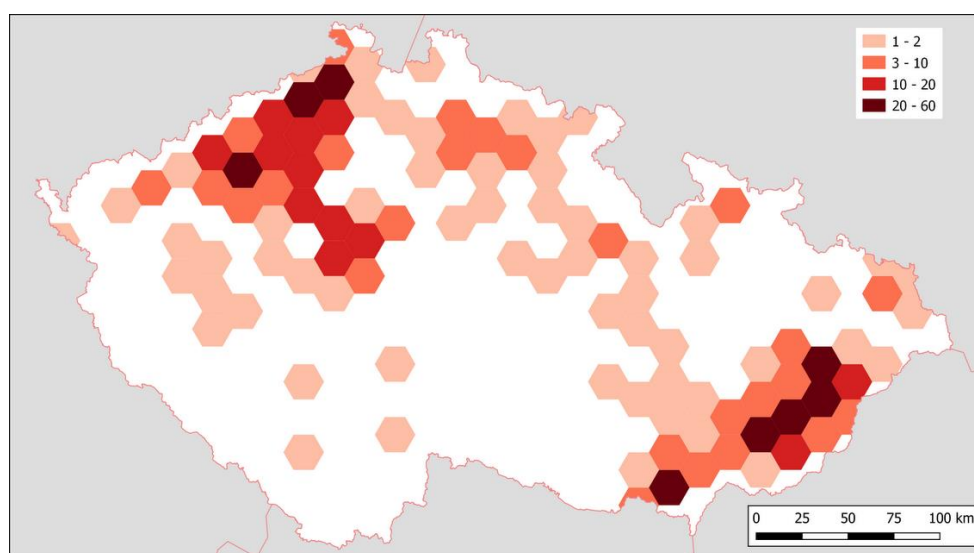

236

237 *Figure 6: Landslide density across Czechia.*

238 While landslide records come from all three core landslide areas, the rockfall records were typical for the west  
 239 part of Czechia (DV area) and along the Vltava/Moldau river valley (VR) south of Prague (Figure 7).

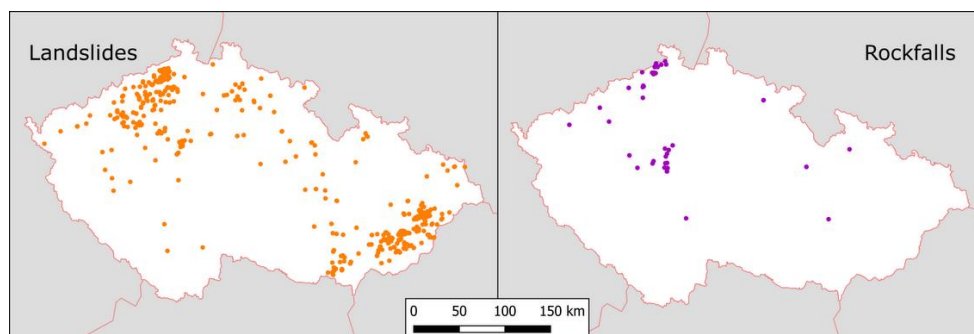

240

241

242

*Figure 7: Landslide and rockfall distribution.*



The temporal variability of the landslide records, represented by their numbers within centuries in the whole studied period, is shown in Table 3. The only one (and at the same time the oldest) record is known from the twelfth century (19 January 1132, see chapter 4.2). No reports were detected between the thirteenth and fifteenth centuries and only five and two reports were recorded in the sixteenth and seventeenth centuries, respectively. While only 8 records were found between the twelfth and seventeenth centuries, and 30 records in the eighteenth century, the majority of the records are evidenced in the last two centuries. Landslide records covering the nineteenth century account for 27.8 % whereas records from the twentieth century embrace 66.8% of all reports.

Table 3: The number of landslide records within centuries in Czechia between the twelfth and twentieth centuries

| Century  | 12 <sup>th</sup> | 13 <sup>th</sup> | 14 <sup>th</sup> | 15 <sup>th</sup> | 16 <sup>th</sup> | 17 <sup>th</sup> | 18 <sup>th</sup> | 19 <sup>th</sup> | 20 <sup>th</sup> * |
|----------|------------------|------------------|------------------|------------------|------------------|------------------|------------------|------------------|--------------------|
| <i>n</i> | 1                | 0                | 0                | 0                | 5                | 2                | 30               | 194              | 467                |

\* up to 1989 including

Due to a rapid increase in landslide records after 1770, a decadal frequency of landslide records was created starting in 1761. The records in the period 1761–1989 represent 98% of all records in CHILDA (Figure 8). The highest numbers of records were registered during the 1891–1900 decade (19 %) followed by 1931–1940 (14 %) and 1961–1970 (14 %) decades. No records were detected, however, between 1791–1810. A significant rise in the number of records is apparent since the 1891–1900 decade and the course over the rest of the twentieth century is more or less variable. The variability has been in all probability influenced by important rainfall and/or snow thaw events.

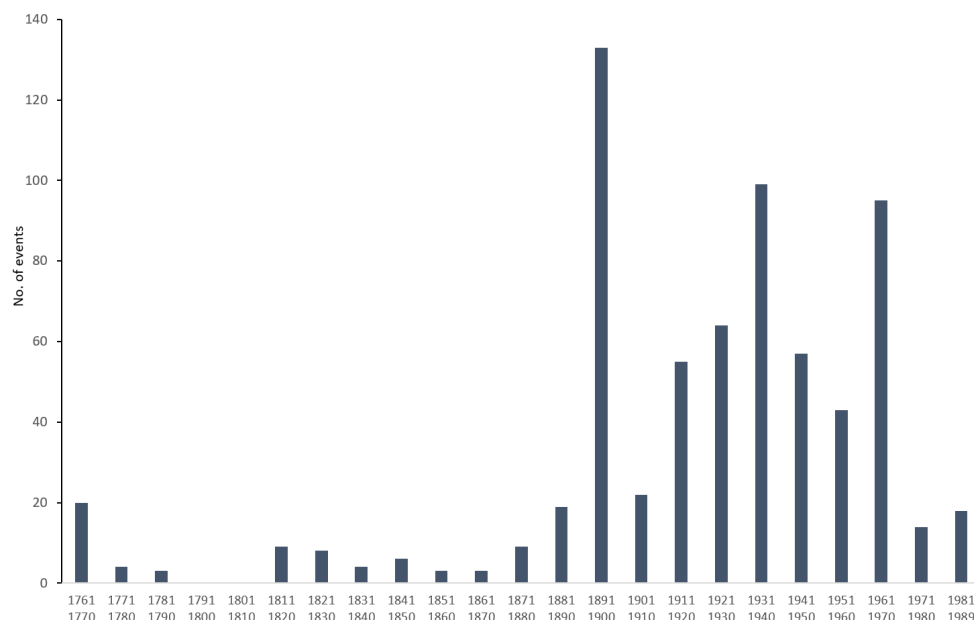

Figure 8: Decadal frequency of landslide records in Czechia between 1761–1989



The first most important landslide year occurred in 1770. A minimal number of landslide records to determine a particular year as the most important landslide year was set at 10 reports. From 1770, 15 such years were revealed encompassing 55% of all records on mass movements (385 out of 699) (Table 4). The highest number of landslide records was found in 1900 (61), 1941 (51), and 1939 (46), representing 15.8%, 13.2, and 11.9% of the most important 15 landslide years, respectively.

*Table 4: The most important 15 landslide years (1770–1989) when at least 10 records were found*

| Year     | 1770 | 1898 | 1899 | 1900 | 1915 | 1919 | 1926 | 1937 |
|----------|------|------|------|------|------|------|------|------|
| <i>n</i> | 17   | 39   | 13   | 61   | 10   | 10   | 32   | 10   |
| Year     | 1938 | 1939 | 1940 | 1941 | 1965 | 1967 | 1970 |      |
| <i>n</i> | 11   | 46   | 19   | 51   | 38   | 14   | 14   |      |

#### 4.2 The Oldest Records on Landsliding

The issue of precise determination of dates of landslide activity is rising when we look back in history. The oldest records describing landslides in Czechia suffer from spatiotemporal inhomogeneity. CHILDA currently contains 14 reports of mass movements which took place before 1770, the first most important landslide year (see Tab. 4). It is important to mention that in 50 % of all recorded cases, citations referring to historical landslides in this study came from the Špůrek landslide catalogue (1972). Because of our efforts at maximum authenticity, we took over these citations although we were not able to study some referred citations personally in certain cases.

The oldest known written report describes a rockfall in Praha – Chuchle (VR area) on 19 January 1132 (Strnad, 1790). More detailed information about three landslide events in spring 1531 is described by chroniclers from Litoměřice and Bílina (CS area). Landsliding was reported from the beginning of April until the middle of May and affected Radobýl Hill near Litoměřice and Holý vrch Hill near Zahorany village. Vineyards planted on the hills and slopes slid and two great parts of Radobýl Hill slipped down, including trees and plants. Similarly, a large portion of Holý vrch Hill slid at that time and a series of other landslides were observed (Smetana, 1978). In the wet spring of 1531, several landslides also occurred in the surroundings of the nearby Bílina River after a flood (Hutter, 1891).

A day before Christmas Eve of 1595 a landslide occurred near Vraclav – Domoradice village (Špůrek, 1967). According to Kárník et al. (1957), seismic activity preceded this event. In March 1599, extraordinary damage was described in Litoměřice (CS area) as a consequence of a great deal of snow and wet weather (Brázdil et al., 2013b). The chronicler described the situation as follows: “A piece of town wall near St. Laurentius [church] fell and collapsed [...] On 16 March [...] at the cemetery [...] a huge section slipped down too so the graves opened and the dead bodies were thrown out [...] That same year, in the month of March, extensive damage to vineyards was experienced by many [people], the walls caved in and one vineyard after another slid and all of this was happening due to great wetness”. In addition, a number of springs appeared on the surface, the cellars were full of water which had to be pumped out and one house even slipped away (Smetana, 1978).

The oldest landslide report from OWC, based on a written record, occurred in the Pavlovské vrchy Hills in Pavlov village in 1663 (Maca, 1994; Kryčér). In contrast to previous mass movement events, continuing



landsliding was also recorded on the same street in 1667 (Štefková-Vajayová, 2001), 1715, 1730, and 1763 (Maca, 1994; Kryčer). A detailed description of landslide damage before 1763 is missing, but the particular landslide consequences in the area of the Pavlovské vrchy Hills in the following years were described by Bíl et al. (2020).

A brief report of landslide occurrence comes from Dečín – Chrochvice (DV area) in 1736 (Mauder, 1931). This event was the first one from a series of consequent landslides in 1823, 1850 and 1914 which affected an area of 16 ha and damaged buildings and local infrastructure (Špůrek, 1972). A similar lack of information relates to a landslide in Ústí nad Labem (DV area) in 1767 (Špůrek, 1972). In contrast the sliding down of a parish cellar in Libeznice village in 1769 is relatively well described by Třebízský (1885) who mentioned great wetness and surfeit of water this year.

306

## 307 5. Discussion

### 308 5.1 CHILDA and Other Historical Landslide Databases

We presented an overview of the CHILDA database where as many as possible records on historical landsliding, which took part in the area of modern Czechia, were collected. This database currently contains 699 records (between 1132 and 1989) and can be compared to other similar databases which have been completed in other countries (Figure 9).

It should be noted, however, that similarly to other databases CHILDA displays high asymmetry in the number of recorded events over time. First, the sole oldest record dated to 1132 extends the span by four centuries as further records are only dated to 1531. Second, the majority of records (93%) relates of landsliding that occurred since 1850. In contrast, and unlike the other databases, CHILDA also records only a few increased landslide frequencies in the pre-industrial periods, namely the 1770 landslide year (17 landslides) resulting from the Central-European adverse climate (Raška et al., 2016), and 1817 (with five landslides) possibly influenced by the Tambora eruption in 1815 (Brázdil et al., 2016b).

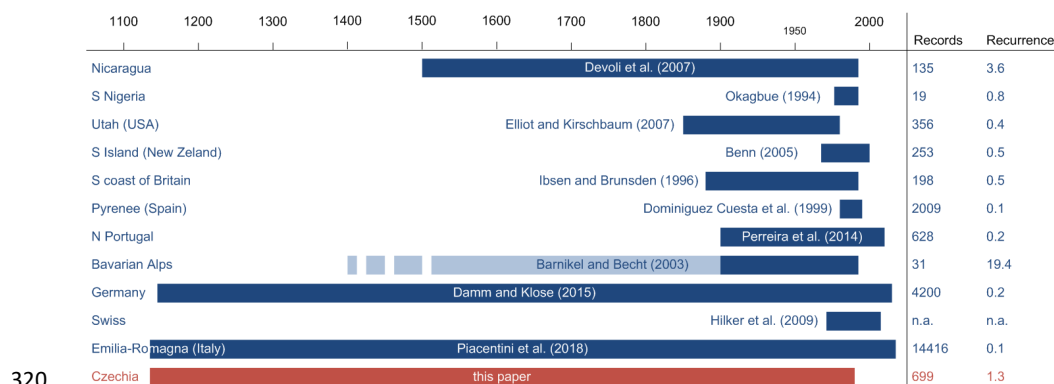

Figure 9: A comparison of CHILDA and other existing historical landslide databases in terms of the number of records and recurrence.

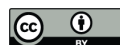

323 *Note: dark-blue stripes mark the periods under study. In case of compound (multi-hazard) databases, light-blue*  
 324 *marks complete the studied period for which geohazards other than landslides have been found, whereas dark-*  
 325 *blue stands for landsliding. Dashed stripes represent an unspecified beginning (e.g., since the fifteenth century*  
 326 *without explicit dating of the oldest record).*

327

## 328 **5. 2 Limitations of the CHILDA Database**

329 As with similar databases which focus on historical records and therefore depend on availability, accessibility  
 330 and reliability of original sources, CHILDA also has certain limitations that may be grouped in the following  
 331 kinds of uncertainties:

332 (a) Uncertainty is usually related to a description of events as landslides (mass movements in general) in the  
 333 documentary records which were named differently. The terminological inconsistency, closely connected with  
 334 exploiting the wide range of documentary data, lasted at least until the twentieth century and persists in media  
 335 reports up until recent days. This inconsistency was caused by gaps in scientific knowledge in the first Czech  
 336 modern landslide classification published in 1954 (Záruba and Mencl, 1954; compared with much earlier  
 337 attempts in English listed in Cruden, 2003), and by cultural and resulting language diversity in the Czech Lands  
 338 up until 1945 (i.e. Czech and German culture realms). Raška et al. (2015) analysed historical landslides in two  
 339 Czech regions and found seven different terms referring to landslides and three for rockfalls. In total, five  
 340 German different terms were used to describe the landslides in the Pavlovské vrchy Hills (OWC) between the  
 341 middle of the seventeenth–twentieth centuries (Bíl et al., 2020).

342 (b) Moreover, documentary evidence was not continuous, sometimes only depending on concrete persons.  
 343 Chroniclers were often not interested in this phenomenon as there were more dangerous ones in this area, such as  
 344 floods (Brázdil et al., 2011; Elleder et al., 2020), strong winds (Brázdil et al., 2004, 2017, 2018b), episodes of  
 345 drought (Brázdil et al., 2013a; Dolák et al., 2015; Řezníčková et al., 2015; Brázdil et al. 2016a, 2019), etc. There  
 346 is obviously also a significant growth of available sources especially since the nineteenth century, which may  
 347 distort the represented landslide frequencies over time. The availability of sources also displays a distinct  
 348 geographical variation due to different historical developments in individual regions. Several smaller  
 349 uncertainties related to historical landslides have thus appeared, e.g., a lack of narrative sources before 1920 and  
 350 in the Czech border areas after 1945 (Bíl et al., 2020) or difficulties with recognition of landslides and scoured  
 351 slopes during the floods in early documentary records. As regards the Czech border areas, chronicles were lost or  
 352 carried away mainly by German inhabitants displaced after 1945. This occurred, along with other regions, in the  
 353 landslide prone areas of the Pavlovské vrchy Hills or parts of NW Czechia (CS and DV). Only some of the lost  
 354 information from the chronicles became available again via a historical synthesis published in the second half of  
 355 the twentieth century (Bíl et al., 2020). In addition, keeping memory books was recommended by the state in  
 356 1836 and chronicles were made mandatory from 1920 onward, therefore any older events are either missing in  
 357 these sources or were recorded retrospectively with some risk of misinterpretation.

358 (c) Additional problems include uncertainties resulting from difficult to identify duplicities in records of different  
 359 coverage (i.e., the issue of upscaling and downscaling) and from false frequency peaks caused by a combination





of continual (regularly published) and stationary (published once as a collection of records) data (Raška et al., 2014b). Both these issues may result in false peaks and gaps in the landslide time series. Verification of data through checking of the data reliability based on comparison among more sources, or field research is not always possible and reliable, and therefore any database must always be considered a catalogue of records rather than events themselves. In the case of the catalogue of events utilisation, these uncertainties relate, e.g., to the example of 12 records in CHILDA that describe more than one event, but the real number is not known. Such events could therefore present events with higher intensities than other events where only single landslides were reported.

In addition, any quantification of landslide extents and their impact is also complicated. We therefore decided to only select from a few attributes generally describing impacts. Reactivations of landslide at the same place could also not be determined exactly. Sometimes, as documented in Bíl et al. (2014) from the village of Halenkovice, villagers from landslide prone areas were used to seeing the landslides often and as a result did not pay attention to them. In contrast, rare landsliding in other areas attracted the attention of the locals. Construction work, related to the first railways across OWC, also both found and caused some landslides (e.g., Záruba, 1938). The apparent lack of documented landslides before 1920 in the Carpathians (except for the Pavlovské vrchy Hills) was attributed by Bíl et al. (2014) to dispersed settlements built primarily from wood, the majority of the unpaved roads and relatively sparse inhabitation in the area. Limited spatial accuracies of historical records often influence any reliable evaluation regarding the possible structural or anthropogenic triggers.

Despite all these uncertainties, documentary evidence stands as a valuable and indispensable source of data describing the occurrence and as well as the consequences of landslides in Czechia during the last five centuries.

### 5. 3 Further Applications and Development of the Database

Data, currently contained in CHILDA, can be further analyzed in order to delineate and explain their temporal and spatial concentration. While the spatial extent of landsliding can easily be understood as an apparent relation to bedrock, temporal distribution has been influenced by important rainfall and/or snow thaw events. Information on landslides with known dates of activities, which is the case of CHILDA records, can therefore be used in such a determination of regional rainfall or total water content triggers. Bíl et al. (2016) have already utilized, for example, the information on landslide periods, defined for an area in the central part of OWC, to determine rainfall thresholds for this area. Further applications of the data will include analyses of the long-term changes in landslide risk reduction approaches, their effectiveness and efficiency (Caloiero et al., 2014; Klose et al., 2016) framed by disaster risk reduction strategies (DRR) (Bíl et al., 2014; UNDRR, 2015). Analysis of community responses to landslide risk in individual landslide-prone areas has already been published by Raška (2019) and Klimeš et al. (2020) and allowed for an exploration of both formal (planning, DRR administration) and informal (community help, mobilization of local knowledge) mechanisms in landslide risk reduction.

## 6. Conclusions

We presented the online landslide database CHILDA (Czech historical landslide database) which summarizes information about landslides which took place in the area of Czechia (the Czech Republic). The database is freely accessible via the <https://childa.cz/> website, and currently includes 699 records (spanning the 1132–1989

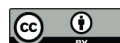

period). The oldest record relates to a rockfall which took place in 1132. In total, the database doubled the number of records known from the previous historical database in Czechia. We further described in detail another eight of the oldest records (1531 to 1730) and analysed centennial and decadal frequencies of landslide records. It was demonstrated that 55 % of all recorded landslide events occurred only within 15 years of the extreme landslide incidence. Finally, the limitations of the documentary data sources have been summarized pointing at uncertainties within the database. The future research direction should focus on analysing historical landslide triggers and their thresholds, changes in spatiotemporal patterns of landslide impacts on society and on narratives of societal adaptive management to landslide risk.

#### Acknowledgements

*Thanks go to Vojtěch Čícha for help with the preparation of figures, Vilém Zábranský for suggesting new data sources that included records on landsliding and David Livingstone for assistance with language editing.*

*Funding: M. Bíl and J. Kubeček worked with the financial support of the Ministry of Transport of the Czech Republic within the program of long-term conceptual development of research institutions on the research infrastructure acquired from the Operation Program Research and Development for Innovations (CZ.1.05/2.1.00/03.0064). P. Raška acknowledges the financial support of the project Smart City—Smart Region—Smart Community (CZ.02.1.01/0.0/0.0/17\_048/0007435) within the Operational Program Research, Development and Education of the Czech Republic. L. Dolák was supported by SustES - Adaptation strategies for sustainable ecosystem services and food security under adverse environmental conditions (CZ.02.1.01/0.0/0.0/16\_019/0000797).*

#### References

- Bíl, M., and Müller, I.: The origin of shallow landslides in Moravia (Czech Republic) in the spring of 2006, *Geomorphology*, 99, 246–253, <https://doi.org/10.1016/j.geomorph.2007.11.004>, 2008.
- Bíl, M., Krejčí, O., Bílová, M., Kubeček, J., Sedoník, J., and Krejčí, V.: A Chronology of landsliding and its impacts on the village of Halenkovice, Outer Western Carpathians, *Geografie*, 119, 342–363, <https://doi.org/10.37040/geografie2014119040342>, 2014.
- Bíl, M., Andrášik, R., Zahradníček, P., Kubeček, J., Sedoník, J., and Štěpánek, P.: Total water content thresholds for shallow landslides, Outer Western Carpathians, *Landslides*, 13, 337–347, <https://doi.org/10.1007/s10346-015-0570-9>, 2016.
- Bíl, M., Andrášik, R., Kubeček, J., Křivánková, Z., and Vodák, R.: RUPOK: An Online Landslide Risk Tool for Road Networks, *Advancing Culture of Living with Landslides*, Vol 5: Landslides in Different Environments, edited by: Mikoš, M., Vilímek, V., Yin, Y., and Sassa, K., Springer International Publishing Ag, Cham, 19–26 pp., 2017.
- Bíl, M., Krejčí, O., Dolák, L., Krejčí, V., Martínek, J., and Svoboda, J.: A chronology of landsliding based on archaeological and documentary data: Pavlovské vrchy Hills, Western Carpathian Flysch Belt, *Scientific Reports*, 10, 976, <https://doi.org/10.1038/s41598-020-57551-4>, 2020.
- Brázdil, R., Dobrovolný, P., Štekl, J., Kotyza, O., Valášek, H., and Jež, J.: History of weather and climate in the Czech Lands. VI, Strong winds, 1st published ed., *History of Weather and Climate in the Czech Lands*, Masaryk University, Brno, 377 pp., 2004.
- Brázdil, R., Řezníčková, L., Valášek, H., Havlíček, M., Dobrovolný, P., Soukalová, E., Řehánek, T., and Skokanová, H.: Fluctuations of floods of the River Morava (Czech Republic) in the 1691–2009 period: interactions of natural and anthropogenic factors, *Hydrological Sciences Journal-Journal Des Sciences Hydrologiques*, 56, 468–485, <https://doi.org/10.1080/02626667.2011.564175>, 2011.
- Brázdil, R., Dobrovolný, P., Trnka, M., Kotyza, O., Řezníčková, L., Valášek, H., Zahradníček, P., and Štěpánek, P.: Droughts in the Czech Lands, 1090–2012 AD, *Climate of the Past*, 9, 1985–2002, <https://doi.org/10.5194/cp-9-1985-2013>, 2013a.



- Brázdil, R., Kotyza, O., Dobrovolný, P., Řezníčková, L., and Valášek, H.: Climate of the Sixteenth Century in the Czech Lands, History of Weather and Climate in the Czech Lands, Masaryk University, Brno, 286 pp., 2013b.
- Brázdil, R., Raška, P., Trnka, M., Zahradníček, P., Valášek, H., Dobrovolný, P., Řezníčková, L., Tremel, P., and Stachoň, Z.: The Central European drought of 1947: causes and consequences, with particular reference to the Czech Lands, Climate Research, 70, 161–178, <https://doi.org/10.3354/cr01387>, 2016a.
- Brázdil, R., Řezníčková, L., Valášek, H., Dolák, L., and Kotyza, O.: Climatic effects and impacts of the 1815 eruption of Mount Tambora in the Czech Lands, Climate of the Past, 12, 1361–1374, <https://doi.org/10.5194/cp-12-1361-2016>, 2016b.
- Brázdil, R., Szabó, P., Dobrovolný, P., Řezníčková, L., Kotyza, O., Suchánková, S., and Valášek, H.: Windstorm of the eighteenth century in the Czech Lands: course, extent, impacts, Theoretical and Applied Climatology, 129, 623–632, <https://doi.org/10.1007/s00704-016-1806-x>, 2017.
- Brázdil, R., Kiss, A., Luterbacher, J., Nash, D. J., and Řezníčková, L.: Documentary data and the study of past droughts: a global state of the art, Clim. Past, 14, 1915–1960, <https://doi.org/10.5194/cp-14-1915-2018>, 2018a.
- Brázdil, R., Stucki, P., Szabó, P., Řezníčková, L., Dolák, L., Dobrovolný, P., Tolasz, R., Kotyza, O., Chromá, K., and Suchánková, S.: Windstorms and forest disturbances in the Czech Lands: 1801–2015, Agricultural and Forest Meteorology, 250, 47–63, <https://doi.org/10.1016/j.agrformet.2017.11.036>, 2018b.
- Brázdil, R., Dobrovolný, P., Trnka, M., Řezníčková, L., Dolák, L., and Kotyza, O.: Extreme droughts and human responses to them: the Czech Lands in the pre-instrumental period, Clim. Past, 15, 1–24, <https://doi.org/10.5194/cp-15-1-2019>, 2019.
- Burda, J., Hartvich, F., Valenta, J., Smítka, V., and Rybář, J.: Climate-induced landslide reactivation at the edge of the Most Basin (Czech Republic) – progress towards better landslide prediction, Nat. Hazards Earth Syst. Sci., 13, 361–374, <https://doi.org/10.5194/nhess-13-361-2013>, 2013.
- Cajz, V.: The České středohoří Mts.: volcanostratigraphy and geochemistry, Geolines, 9, 21–28, 1999.
- Caloiero, T., Pasqua, A. A., and Petrucci, O.: Damaging Hydrogeological Events: A Procedure for the Assessment of Severity Levels and an Application to Calabria (Southern Italy), Water, 6, 3652–3670, <https://doi.org/10.3390/w6123652>, 2014.
- Caracciolo, D., Arnone, E., Conti, F. L., and Noto, L. V.: Exploiting historical rainfall and landslide data in a spatial database for the derivation of critical rainfall thresholds, Environmental Earth Sciences, 76, 222, <https://doi.org/10.1007/s12665-017-6545-5>, 2017.
- Crozier, M. J., and Glade, T.: Frequency and magnitude of landsliding: Fundamental research issues, Zeitschrift für Geomorphologie, Supplementband, 115, 141–155, 10.1127/zfgsuppl/115/1999/141, 1999.
- Cruden, D. M.: The First Classification of Landslides?, Environmental and Engineering Geoscience, 9, 197–200, <https://doi.org/10.2113/9.3.197>, 2003.
- Čermák, J.: Sesutí stráně a hrazení jezera u Mladotic: předběžná zpráva [Landslide and the landslide-dammed lake of Mladotice: a preliminary report], Sborník České společnosti zeměvědné, 18, 19–23, 1912.
- CHILDA - Czech Historical Landslide Database: <https://childa.cz>, access: 9 April 2021, 2021.
- CHMI - Czech Hydrometeorological Institute: [www.chmi.cz](http://www.chmi.cz), access: 9 April 2021, N/A.
- Czech Geological Survey: [www.geology.cz](http://www.geology.cz), access: 8 February 2021, 2012a.
- Czech Geological Survey Map Server: [https://mapy.geology.cz/arcgis/rest/services/Inspire/GM2\\_5mil/MapServer?f=jsonapi](https://mapy.geology.cz/arcgis/rest/services/Inspire/GM2_5mil/MapServer?f=jsonapi) access: 5 March 2021, 2012b.
- Damm, B., and Klose, M.: The landslide database for Germany: Closing the gap at national level, Geomorphology, 249, 82–93, <https://doi.org/10.1016/j.geomorph.2015.03.021>, 2015.
- Dědina, V.: Sesouvání stráně na Chlomeku u Ml. Boleslavě [Landsliding at Chloumek by Ml. Boleslav town], Sborník České společnosti zeměvědné, 2, 40–41, 1896.
- Dědina, V.: Sesutí půdy pod Chlomekem u Ml. Boleslavi [Landslide of earth at Chloumek by Ml. Boleslav town], Sborník České společnosti zeměvědné, 22, 160–166, 1916.
- Devoli, G., Morales, A., and Høeg, K.: Historical landslides in Nicaragua - collection and analysis of data, Landslides, 4, 5–18, <https://doi.org/10.1007/s10346-006-0048-x>, 2007.
- Dolák, L., Brázdil, R., Řezníčková, L., and Valášek, H.: Selected drought impacts in South Moravia in the 18th and 20th centuries based on documentary evidence, In: Otmar Urban, Mirka Šprtová, Karel Klem. Global Change: A Complex Challenge. Conference Proceedings. Global Change Research Centre, The Czech Academy of Sciences, v.v.i., Brno, 30–33 pp., 2015.
- Elleder, L., Krejčí, J., Racko, S., Daňhelka, J., Šírová, J., and Kašpárek, L.: Reliability check of flash-flood in Central Bohemia on May 25, 1872, Global and Planetary Change, 187, 103094, <https://doi.org/10.1016/j.gloplacha.2019.103094>, 2020.
- Elliott, A., and Kirschbaum, M.: The preliminary landslide history database of Utah, 1850–1978, Utah Geological Survey, 514, 5, 2007.



- 500 Forczek, I.: Destruction of marginal parts of sandstone plateaus in the protected landscape area Bohemian  
501 Paradise, *Acta Geodyn. Geomater.*, 5, 267–274, 2008.
- 502 Froude, M. J., and Petley, D. N.: Global fatal landslide occurrence from 2004 to 2016, *Natural Hazards and*  
503 *Earth System Sciences*, 18, 2161–2181, <https://doi.org/10.5194/nhess-18-2161-2018>, 2018.
- 504 Gariano, S. L., and Guzzetti, F.: Landslides in a changing climate, *Earth-Sci. Rev.*, 162, 227–252,  
505 <https://doi.org/10.1016/j.earscirev.2016.08.011>, 2016.
- 506 Glade, T., Albini, P., and Frances, F.: An introduction to the use of historical data in natural hazard assessments,  
507 *Use of Historical Data in Natural Hazard Assessments*, edited by: Glade, T., Albini, P., and Frances, F.,  
508 Springer, Dordrecht, 2001.
- 509 Guzzetti, F., Cardinali, M., and Reichenbach, P.: The AVI project: A bibliographical and archive inventory of  
510 landslides and floods in Italy, *Environmental Management*, 18, 623–633, <https://doi.org/10.1007/BF02400865>,  
511 1994.
- 512 Hermanns, R., Hansen, L., Sletten, K., Böhme, M., Bunkholt, H., Dehls, J., Eilertsen, R., Fischer, L., L'Heureux,  
513 J.-S., Høgaas, F., Nordahl, B., Oppikofer, T., Rubensdotter, L., Solberg, I.-L., Stalsberg, K., and Yugsi Molina,  
514 F. X.: Systematic geological mapping for landslide understanding in the Norwegian context, in: *Landslide and*  
515 *engineered slopes: protecting society through improved understanding*, edited by: Eberhardt, E., Froese, C.,  
516 Turner, A. K., and Leroueil, S., Taylor & Francis Group, London, 265–271, 2013.
- 517 Herrera, G., Mateos, R. M., García-Davalillo, J. C., Grandjean, G., Poyiadji, E., Maftai, R., Filipciuc, T.-C.,  
518 Jemec Auflič, M., Jež, J., Podolszki, L., Trigila, A., Iadanza, C., Raetzo, H., Kociu, A., Przyłucka, M., Kułak,  
519 M., Sheehy, M., Pellicer, X. M., McKeown, C., Ryan, G., Kopačková, V., Frei, M., Kuhn, D., Hermanns, R. L.,  
520 Koulermou, N., Smith, C. A., Engdahl, M., Buxó, P., Gonzalez, M., Dashwood, C., Reeves, H., Cigna, F.,  
521 Liščák, P., Paudits, P., Mikulénas, V., Demir, V., Raha, M., Quental, L., Sandić, C., Fusi, B., and Jensen, O. A.:  
522 *Landslide databases in the Geological Surveys of Europe*, *Landslides*, 15, 359–379,  
523 <https://doi.org/10.1007/s10346-017-0902-z>, 2018.
- 524 Hroch, Z., Kyčl, P., and Šebesta, J.: Landslide hazards in North Bohemia, in: *Landslides: Proceedings of the*  
525 *First European Conference on Landslides*, edited by: Rybář, J., Stemberk, J., and Wagner, P., Swets &  
526 Zeitlinger, Lisse, 207–212, 2002.
- 527 Hungr, O., Leroueil, S., and Picarelli, L.: The Varnes classification of landslide types, an update, *Landslides*, 11,  
528 167–194, <https://doi.org/10.1007/s10346-013-0436-y>, 2014.
- 529 Hutter, T.: *Die Stadt Bilin und ihre Geschichte von der ältesten Zeit bis auf unsere Tage (1890)*, Verlag des  
530 Bürgermeistersamtes, Bilin, 168 pp., 1891.
- 531 Jüttner, K.: *Die Rutschgebiete an den Hägen der Pollauer Berge*, *Firgenwald*, 4, 108–121, 1931.
- 532 Jüttner, K.: *Die erdgeschichtliche Entwicklung des Bodens der Gemeinde Pollau*, *Deutsch-mähr.-schles. Heimat*,  
533 11/12, 23, 1–6, 1937.
- 534 Kalvoda, J., and Balatka, B.: Chronodynamics of the Labe River antecedence in the Děčínská vrchovina  
535 Highland, Czech Republic, *Acta Montana IRSM AS CR Series A*, 8, 43–60, 1995.
- 536 Kárník, V., Michal, E., and Molnár, A.: *Erdbebenkatalog der Tschechoslowakei bis zum Jahre 1956*, *Travaux*  
537 *Géophysiques*, 69, 411–598, 1957.
- 538 Kjeldsen, T. R., Macdonald, N., Lang, M., Mediero, L., Albuquerque, T., Bogdanowicz, E., Brázdil, R.,  
539 Castellarin, A., David, V., Fleig, A., Gul, G. O., Kriauciuniene, J., Kohnová, S., Merz, B., Nicholson, O., Roald,  
540 L. A., Salinas, J. L., Sarauskienė, D., Šraj, M., Strupczewski, W., Szolgay, J., Toumazis, A., Vanneuville, W.,  
541 Veijalainen, N., and Wilson, D.: Documentary evidence of past floods in Europe and their utility in flood  
542 frequency estimation, *Journal of Hydrology*, 517, 963–973, <https://doi.org/10.1016/j.jhydrol.2014.06.038>, 2014.
- 543 Klimeš, J., Stemberk, J., Blahut, J., Krejčí, V., Krejčí, O., Hartvich, F., and Kyčl, P.: Challenges for landslide  
544 hazard and risk management in 'low-risk' regions, Czech Republic-landslide occurrences and related costs (IPL  
545 project no. 197), *Landslides*, 14, 771–780, <https://doi.org/10.1007/s10346-017-0798-7>, 2017.
- 546 Klimeš, J., Müllerová, H., Woitsch, J., Bíl, M., and Křížová, B.: Century-long history of rural community  
547 landslide risk reduction, *International Journal of Disaster Risk Reduction*, 51, 101756,  
548 <https://doi.org/10.1016/j.ijdrr.2020.101756>, 2020.
- 549 Klose, M., Maurischat, P., and Damm, B.: Landslide impacts in Germany: A historical and socioeconomic  
550 perspective, *Landslides*, 13, 183–199, <https://doi.org/10.1007/s10346-015-0643-9> 2016.
- 551 Kozák, J., and Rybář, J.: Special Contribution: Pictorial Series of the Manifestations of the Dynamics of the  
552 Earth: 3. Historical Images of Landslides and Rock Falls, *Studia Geophysica et Geodaetica*, 47, 221–232,  
553 <https://doi.org/10.1023/A:1022220126463>, 2003.
- 554 Krejčí, J.: *Sesuvná území na Zlínsku [Landslide areas in the Zlín region]*, *Práce Moravské přírodovědecké*  
555 *společnosti*, 15, F156, 1943.
- 556 Krejčí, O., Krejčí, V., Kyčl, P., Paleček, M., and Rybář, J.: Bohyně in Děčín district - the largest landslide area in  
557 the Czech Republic, *Geoscience Research Reports*, 50, 227–234, 10.3140/zpravy.geol.2017.38 2017.



- 558 Krejčí, O., Baroň, I., Bíl, M., Hubatka, F., Jurová, Z., and Kirchner, K.: Slope movements in the Flysch  
 559 Carpathians of Eastern Czech Republic triggered by extreme rainfalls in 1997: a case study, *Physics and*  
 560 *Chemistry of the Earth, Parts A/B/C*, 27, 1567–1576, [https://doi.org/10.1016/S1474-7065\(02\)00178-X](https://doi.org/10.1016/S1474-7065(02)00178-X), 2002.  
 561 Kryčer, R.: Dějiny obcí Bavory, Bulhary, Klentnice, Mušov, Pavlov, Perná, Sedlec, Dolní Věstonice, Horní  
 562 Věstonice [Histories of the municipalities of Bavory, Bulhary, Klentnice, Mušov, Pavlov, Perná, Sedlec, Dolní  
 563 Věstonice and Horní Věstonice], The State District Archive in Břeclav, (undated document).  
 564 Maca, J.: Pollauer Heimatbuch: 1334–1946: Geschichte und Schicksal einer deutschen Gemeinde in Südmähren,  
 565 Selbstverlag, Wien, 551 pp., 1994.  
 566 Marc, O., Stumpf, A., Malet, J. P., Gosset, M., Uchida, T., and Chiang, S. H.: Initial insights from a global  
 567 database of rainfall-induced landslide inventories: the weak influence of slope and strong influence of total storm  
 568 rainfall, *Earth Surf. Dyn.*, 6, 903–922, <https://doi.org/10.5194/esurf-6-903-2018>, 2018.  
 569 Mauder, E.: Chronik von Bodenbach, Verlag der Stadtgemeinde, Tetschen-Bodenbach, 445 pp., 1931.  
 570 Pánek, T., Brázdil, R., Klimeš, J., Smolková, V., Hradecký, J., and Zahradníček, P.: Rainfall-induced landslide  
 571 event of May 2010 in the eastern part of the Czech Republic, *Landslides*, 8, 507–516,  
 572 <https://doi.org/10.1007/s10346-011-0268-6>, 2011.  
 573 Pereira, S., Zêzere, J. L., Quaresma, I. D., and Bateira, C.: Landslide incidence in the North of Portugal: Analysis  
 574 of a historical landslide database based on press releases and technical reports, *Geomorphology*, 214, 514–525,  
 575 <https://doi.org/10.1016/j.geomorph.2014.02.032>, 2014.  
 576 Piacentini, D., Troiani, F., Daniele, G., and Pizziolo, M.: Historical geospatial database for landslide analysis:  
 577 the Catalogue of Landslide OCcurrences in the Emilia-Romagna Region (CLOCKER), *Landslides*, 15, 811–822,  
 578 <https://doi.org/10.1007/s10346-018-0962-8>, 2018.  
 579 Pilous, V.: Strukturní mury v Krkonoších – I. část, *Opera Corcontica*, 10, 15–69, 1973.  
 580 Raška, P., Hartvich, F., Cajz, V., and Adamovič, J.: Structural setting of the Certovka landslide (Usti nad Labem,  
 581 Czech Republic): morphostructural analysis and electrical resistivity tomography, *Geol. Q.*, 58, 85–98,  
 582 <https://doi.org/10.7306/gq.1134>, 2014a.  
 583 Raška, P., Zábranský, V., Dubišar, J., Kadlec, A., Hrbáčová, A., and Strnad, T.: Documentary proxies and  
 584 interdisciplinary research on historic geomorphologic hazards: a discussion of the current state from a central  
 585 European perspective, *Natural Hazards*, 70, 705–732, <https://doi.org/10.1007/s11069-013-0839-z>, 2014b.  
 586 Raška, P., Klimeš, J., and Dubišar, J.: Using Local Archive Sources to Reconstruct Historical Landslide  
 587 Occurrence in Selected Urban REGions of the Czech Republic: Examples from Regions with Different Historical  
 588 Development, *Land Degradation & Development*, 26, 142–157, <https://doi.org/10.1002/ldr.2192>, 2015.  
 589 Raška, P., Zábranský, V., Brázdil, R., and Lamková, J.: The late Little Ice Age landslide calamity in North  
 590 Bohemia: Triggers, impacts and post-landslide development reconstructed from documentary data (case study of  
 591 the Koží vrch Hill landslide), *Geomorphology*, 255, 95–107, <https://doi.org/10.1016/j.geomorph.2015.12.009>,  
 592 2016.  
 593 Raška, P., and Dubišar, J.: Impacts of natural hazards on an early industrial community: A case study of North  
 594 Bohemia and its implications for long-term vulnerability assessment, *Moravian Geographical Reports*, 25, 13–  
 595 23, <https://doi.org/10.1515/mgr-2017-0002>, 2017.  
 596 Raška, P.: Contextualizing community-based landslide risk reduction: an evolutionary perspective, *Landslides*,  
 597 16, 1747–1762, <https://doi.org/10.1007/s10346-018-1099-5>, 2019.  
 598 Remondo, J., Bonachea, J., and Cendrero, A.: Quantitative landslide risk assessment and mapping on the basis of  
 599 recent occurrences, *Geomorphology*, 94, 496–507, <https://doi.org/10.1016/j.geomorph.2006.10.041>, 2008.  
 600 Řezníčková, L., Brázdil, R., Kotyza, O., and Valášek, H.: Documentary evidence as a source of data for studying  
 601 droughts in the Czech Lands, In: *Global Change: A Complex Challenge. Conference Proceedings*. Brno: Global  
 602 Change Research Centre, The Czech Academy of Sciences, v.v.i., Brno, 26–29 pp., 2015.  
 603 Smetana, J.: Nejstarší kronikářské záznamy litoměřických radních písařů [The earliest chronicle records of  
 604 councillor scribes in Litoměřice], *Vlastivědný sborník Litoměřicko*, 14, 119–142, 1978.  
 605 Stejskal, J.: Svážná území na Pavlovských vrších [Landslide areas of the Pavlovské vrchy Hills], *Sborník*  
 606 *československé akademie zemědělské*, 6, 55–94, 1931  
 607 Strnad, A.: Chronologisches Verzeichnis der Naturbegebenheiten im Königsreich Böhmen vom Jahre Christi  
 608 633 bis 1700, Prague, 139 pp., 1790.  
 609 Špůrek, M.: Historická analýza působení klimatického sesuvného faktoru v Českém masivu [Historical analysis  
 610 of the climatic effect on landsliding in the Bohemian Massif], *Archive of the Czech Geological Survey –*  
 611 *Geofond Prague*, 42 pp., 1967.  
 612 Špůrek, M.: Historical catalogue of slide phenomena, *Stud Geographica*, ČSAV, Brno, 178 pp., 1972.  
 613 Špůrek, M.: Československá bibliografie svahových deformací. Dodatky 1. 1, 105 [The Czechoslovak  
 614 bibliography of slope deformations, Amendments 1.1.105], MS Geofond, Prague, non-paginated pp., 1985.  
 615 Štefková-Vajayová, M.: Kronika obce Pavlov [Chronicle of Pavlov municipality], Municipal office, Pavlov, 168  
 616 pp., 2001.



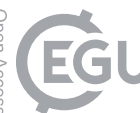

- 617 Taylor, F. E., Malamud, B. D., Freeborough, K., and Demeritt, D.: Enriching Great Britain's National Landslide  
 618 Database by searching newspaper archives, *Geomorphology*, 249, 52–68,  
 619 <https://doi.org/10.1016/j.geomorph.2015.05.019>, 2015.
- 620 Tropeano, D., and Turconi, L.: Using Historical Documents for Landslide, Debris Flow and Stream Flood  
 621 Prevention. Applications in Northern Italy, *Natural Hazards*, 31, 663–679,  
 622 <https://doi.org/10.1023/B:NHAZ.0000024897.71471.f2> 2004.
- 623 Třebizský, V. B.: Paměti Jiřího Václava Paroubka, někdy vikáře a faráře v Libeznicích (1740–1774) [Memoirs  
 624 of Jiří Václav Paroubek, a vicar and a priest in Libeznice (1740–1774)], *Sborník historický*, 2, 73–87, 1885.
- 625 Van Den Eeckhaut, M., Muys, B., Van Loy, K., Poesen, J., and Beeckman, H.: Evidence for repeated re-  
 626 activation of old landslides under forest, *Earth Surface Processes and Landforms*, 34, 352–365,  
 627 <https://doi.org/10.1002/esp.1727>, 2009.
- 628 Van Den Eeckhaut, M., and Hervás, J.: State of the art of national landslide databases in Europe and their  
 629 potential for assessing landslide susceptibility, hazard and risk, *Geomorphology*, 139–140, 545–558,  
 630 <https://doi.org/10.1016/j.geomorph.2011.12.006>, 2012.
- 631 Woldřich, J., and Stejskal, J.: Geologický profil hlinišťem a svážení v cihelně u Dolních Věstonic na Moravě  
 632 [Geological profile of clay-pit in brickfield by Dolní Věstonice village in Moravia], *Věda přírodní: měsíčník pro*  
 633 *šíření a pěstování věd přírodních: časopis pro přírodovědeckou vlastivědu. Zvláštní otisk z časopisu Věda*  
 634 *přírodní*, 15, 129–137, 1934.
- 635 Woldřich, J. N.: Sesutí u Klapého z roku 1898 [Landslide at Klapý in 1899], *Královská česká společnost nauk.*  
 636 *Věstník Královské české společnosti nauk. Třída mathematicko-přírodovědecká, non-paginated*, 1899.
- 637 Wu, C. Y., and Yeh, Y. C.: A Landslide Probability Model Based on a Long-Term Landslide Inventory and  
 638 Rainfall Factors, *Water*, 12, 17, <https://doi.org/10.3390/w12040937>, 2020.
- 639 Zahálka, Č.: O ssutinách čedičových a znělcových v Českém středohoří [On basaltic and phonolitic scree slopes  
 640 of the České středohoří Mts.], *Vesmír*, 20, 66–67, 1890.
- 641 Záruba, Q.: Studie o sesuvných terénech na Vsatsku a Valašsku [A study on landslide terrains of the Vsatsko and  
 642 Valašsko regions], *Časopis Moravského musea zemského*, 20–21, 170–180, 1922.
- 643 Záruba, Q.: Studie o sesouvání půdy na Hlučínsku [A study on landsliding in the Hlučínsko area], *Technický*  
 644 *obzor*, 37, 8, 1923.
- 645 Záruba, Q.: Sesouvání půdy v oblasti českého útvaru křídového [Landsliding in the Bohemian Cretaceous  
 646 Basin], *Věstník státního geologického ústavu*, 2, 226–235, 1926.
- 647 Záruba, Q.: Sesuvy v Lyském průsmyku a jejich význam pro komunikační stavby [Landslides in the Lysský  
 648 průsmyk pass and their significance for the communication buildings], *Technický obzor*, 46, 1–29, 1938.
- 649 Záruba, Q., and Myslivec, A.: Sesuvy při komunikačních stavbách ve flyšovém území [Landslides at  
 650 transportation constructions in flysch area], *Technický obzor*, 50, 199–230 1942.
- 651 Záruba, Q., and Mencl, V.: Inženýrská geologie [Engineering Geology], Academia, Prague, 428 pp., 1954.
- 652 Zvelebil, J., Vařilová, Z., and Paluš, M.: Tools for Rock Fall Risk Integrated Management in Sandstone  
 653 Landscape of the Bohemian Switzerland National Park, Czech Republic (M121), in: *Landslides*, edited by: K.,  
 654 S., H. F., F., W., and G., W., Springer, Berlin, Heidelberg, 119–126, 2005.
- 655
